# Supplementary material
Source: Springer Nature journal article supplement (https://www.springermedizin.de/resource/supplementary/13054_2009_8337_MOESM1_ESM.pdf/9731740)
Supplement: MOESM1 [file 9731740]

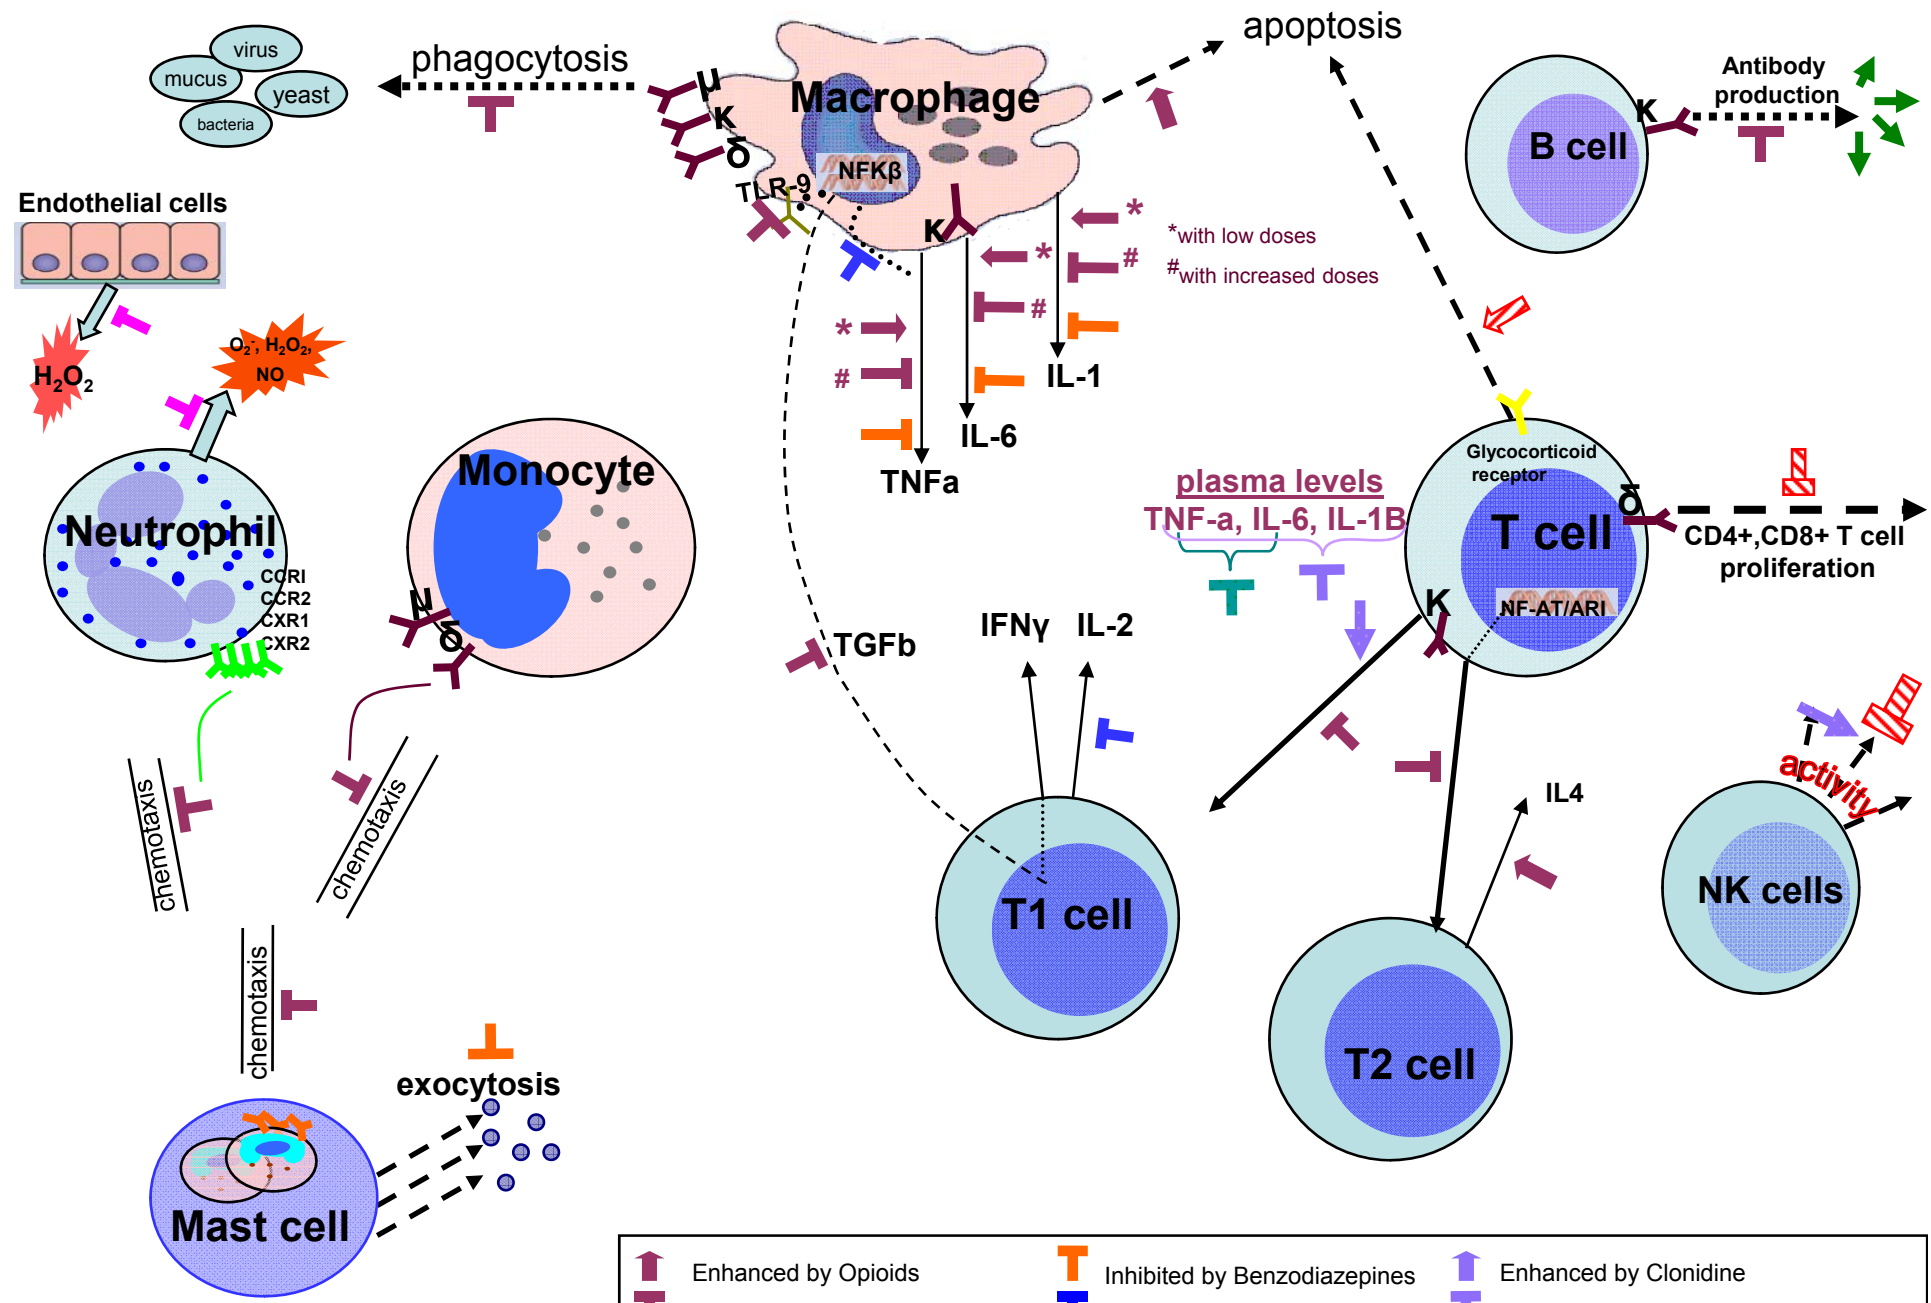

|  |                                |  |                                                                |  |                              |
|--|--------------------------------|--|----------------------------------------------------------------|--|------------------------------|
|  | Enhanced by Opioids            |  | Inhibited by Benzodiazepines                                   |  | Enhanced by Clonidine        |
|  | Inhibited by Opioids           |  | Inhibited by Barbiturates                                      |  | Inhibited by Clonidine       |
|  | Enhanced by Opioid withdrawal  |  | Inhibited by Propofol                                          |  | Inhibited by Dexmedetomidine |
|  | Inhibited by Opioid withdrawal |  | Cell receptor - $\mu$ , $\kappa$ , $\delta$ = opioid receptors |  |                              |
